# Supplementary material for: BAF53A drives colorectal cancer development by regulating DUSP5-mediated ERK phosphorylation
Source: Springer Nature journal article supplement (doi:10.1038/s41419-022-05499-w), 2022-12-16
Supplement: MOESM1 [file 41419_2022_5499_MOESM1_ESM.pdf]

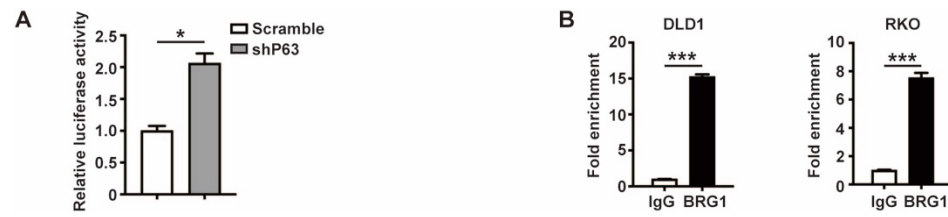

**Supplementary Fig. 1 BAF53A promotes p63-mediated transcriptional repression of DUSP5 through chromatin remodeling by the BAF complex.**

**A** P63 knockdown increased DUSP5 promoter activity.  $*P < 0.05$ . **B** Chromatin was precipitated from DLD1 and RKO cells with antibodies against BRG1, or IgG, and analyzed by qPCR (mean  $\pm$  SD).  $***P < 0.001$ .
